# Supplementary material
Source: PubMed Central journal article supplement (PMC4765196)
Supplement: JSLHR-58-1182-s001.pdf [file JSLHR-58-1182-s001.pdf]

**Supplemental Table 1.** Word stimuli prepared for Experiment 1.

| <b>Item</b>               | <b>Low</b>                                   | <b>High 1</b> | <b>High 2</b> | <b>High 3</b> |
|---------------------------|----------------------------------------------|---------------|---------------|---------------|
| 1                         | bee                                          | dog           | rabbit        | horse         |
| 2                         | deer                                         | camel         | monkey        | giraffe       |
| 3                         | donkey                                       | squirrel      | fish          | snake         |
| 4                         | rooster                                      | frog          | cat           | owl           |
| 5                         | blouse                                       | sock          | shoe          | glove         |
| 6                         | coat                                         | dress         | hat           | skirt         |
| 7                         | dresser                                      | door          | window        | drum          |
| 8                         | couch                                        | lamp          | bed           | chair         |
| 9                         | bow                                          | saw           | ruler         | desk          |
| 10                        | stove                                        | candle        | guitar        | football      |
| 11                        | kettle                                       | hammer        | kite          | whistle       |
| 12                        | (frying) pan                                 | ladder        | spoon         | fork          |
| 13                        | pot                                          | bowl          | clock         | key           |
| 14                        | purse                                        | pencil        | toaster       | button        |
| 15                        | wagon                                        | ring          | book          | bottle        |
| 16                        | glass                                        | crown         | broom         | scissors      |
| <b><u>Mean values</u></b> |                                              |               |               |               |
| Codability                | 65%                                          | 99%           | 98%           | 98%           |
| Log frequency             | 1.19                                         | 1.36          | 1.51          | 1.40          |
| Image agree               | 3.35                                         | 3.65          | 3.74          | 3.95          |
| Familiarity               | 3.48                                         | 3.54          | 3.90          | 3.44          |
| Visual complexity         | 3.00                                         | 2.79          | 2.91          | 2.90          |
| Length                    | 1.38                                         | 1.38          | 1.38          | 1.38          |
| Categories                | 4 animals, 2 clothes, 2 furniture, 8 objects |               |               |               |
