# Supplementary material
Source: PubMed Central journal article supplement (PMC4765196)
Supplement: JSLHR-58-1182-s002.pdf [file JSLHR-58-1182-s002.pdf]

**Supplemental Table 2.** Target sentence stimuli for Experiment 2 with corresponding verb primes.

| <b>No.</b> | <b><u>Prime verbs</u></b> |                   | <b><u>Target sentences</u></b>       |                               |
|------------|---------------------------|-------------------|--------------------------------------|-------------------------------|
|            | <b>Unaccusative</b>       | <b>Transitive</b> | <b>Transitive sentences</b>          | <b>Unaccusative sentences</b> |
| 1          | bloom                     | choose            | The man is rolling the tire.         | The wheel is rolling.         |
| 2          | flow                      | fix               | The mouse is rolling the cheese.     | The can is rolling.           |
| 3          | die                       | fill              | The man is breaking the wood.        | The glass is breaking.        |
| 4          | arrive                    | consume           | The farmer is breaking the shovel.   | The chain is breaking.        |
| 5          | appear                    | examine           | The girl is dropping the cup.        | The bomb is dropping.         |
| 6          | occur                     | peel              | The waitress is dropping the cake.   | The curtain is dropping.      |
| 7          | come                      | push              | The chef is melting the butter.      | The snowman is melting.       |
| 8          | arise                     | bury              | The boy is melting the ice.          | The butter is melting.        |
| 9          | remain                    | destroy           | The lady is boiling the pasta.       | The soup is boiling.          |
| 10         | exist                     | measure           | The check is boiling the water.      | The water is boiling.         |
| 11         | decay                     | erase             | The nun is ringing the bell.         | The phone is ringing.         |
| 12         | stumble                   | inspect           | The mailman is ringing the doorbell. | The alarm is ringing.         |
| 13         | emerge                    | tickle            | The woman is drying her hair.        | The skirt is drying.          |
| 14         | stay                      | kill              | The girl is drying the towel.        | The shirt is drying.          |
| 15         | vanish                    | serve             | The nurse is opening the box.        | The door is opening.          |
| 16         | prevail                   | carry             | The waiter is opening the bottle.    | The window is opening.        |
| 17         | expire                    | cover             | The man is burning the book.         | The match is burning.         |
| 18         | stand                     | pull              | The witch is burning the tree.       | The candle is burning.        |
| 19         | rise                      | pick              | The cowboy is playing the guitar.    | The record is playing.        |
| 20         | evolve                    | complete          | The man is bouncing the ball.        | The ball is bouncing.         |
